# Supplementary material for: The psychology of breakup sex: Exploring the motivational factors and affective consequences of post-breakup sexual activity
Source: PubMed Central journal article supplement — Evol Psychol. 2020 Jul 30;18(3):1474704920936916. doi: 10.1177/1474704920936916 (PMC10359486; doi:10.1177/1474704920936916), 2020-07-30
Supplement: Supp_Material_Item_Sex_Breakdown(3.27.20).pdf [file Supp_Material_Item_Sex_Breakdown%283.27.20%29.pdf]

Based on a request from a reviewer, we have incorporated breakdown of the items by sex. The reasons for why the participants have breakup sex are in the same order as in Table 3 in the manuscript.

A one way MANOVA was conducted and revealed that men and women differed. Due to the fact there were 52 items included in the MANOVA, we adjusted our significance threshold to  $p < .005$ . This is consistent with common procedures associated with the type of methodology we followed for this research, specifically the methodology utilized in Meston and Buss (2007).

Table 3a.  
*Gender differences for having breakup sex.*

| Reasons to Have Breakup Sex             | Men<br>M(SD) | Women<br>M(SD) |
|-----------------------------------------|--------------|----------------|
| 1. Still in love                        | 2.69(1.38)   | 2.94(1.44)     |
| 2. Still have feelings                  | 3.16(1.28)   | 3.13(1.40)     |
| 3. Miss them                            | 2.95(1.28)   | 3.14(1.40)     |
| 4. Wanted to get back together          | 2.63(1.37)   | 2.72(1.48)     |
| 5. Regret the breakup                   | 2.43(1.28)   | 2.52(1.36)     |
| 6. Feel a connection again              | 3.03(1.31)   | 3.07(1.43)     |
| 7. Feel love                            | 2.77(1.40)   | 2.90(1.47)     |
| 8. Can't move on                        | 2.52(1.36)   | 2.53(1.37)     |
| 9. See if there are still feelings      | 2.88(1.29)   | 2.94(1.43)     |
| 10. There was a longing                 | 3.16(1.23)   | 3.12(1.37)     |
| 11. There was passion                   | 3.23(1.30)   | 3.17(1.32)     |
| 12. Confusion about breakup             | 2.35(1.27)   | 2.27(1.32)     |
| 13. I am lonely                         | 2.82(1.35)   | 2.86(1.34)     |
| 14. Didn't mutually end relationship    | 2.52(1.33)   | 2.34(1.30)     |
| 15. They act like they miss me          | 3.07(1.24)   | 3.00(1.33)     |
| 16. To feel better                      | 3.26(1.23)   | 3.15(1.35)     |
| 17. I need attention                    | 2.55(1.26)   | 2.74(1.35)     |
| 18. Afraid to seek out new relationship | 2.46(1.26)   | 2.32(1.33)     |
| 19. Miss sex                            | 3.38(1.33)** | 3.01(1.35)**   |
| 20. Opportunity came up                 | 3.78(1.27)** | 3.36(1.30)**   |
| 21. Satisfy my needs                    | 3.63(1.25)   | 3.42(1.33)     |

|                                                     |               |               |
|-----------------------------------------------------|---------------|---------------|
| 22. It is easy                                      | 3.31(1.27)    | 3.24(1.33)    |
| 23. Because I could                                 | 3.45(1.36)    | 3.15(1.37)    |
| 24. It is exciting                                  | 3.52(1.23)**  | 3.02(1.36) ** |
| 25. Comfortable with my ex                          | 3.44(1.27)    | 3.58(1.32)    |
| 26. Knows what the other likes                      | 3.30(1.29)**  | 2.91(1.38) ** |
| 27. No STD risks                                    | 3.12(1.60)    | 2.74(1.60)    |
| 28. Sexual tension                                  | 3.39(1.21)    | 3.07(1.37)    |
| 29. Sex is fun                                      | 4.26(1.09)**  | 3.56(1.28) ** |
| 30. Better than before                              | 2.54(1.32)    | 2.31(1.27)    |
| 31. Other people do it                              | 2.04(1.22)**  | 1.74(1.10) ** |
| 32. To tell people I did it                         | 1.69(1.11)**  | 1.31(.74) **  |
| 33. Get back on the dating market                   | 2.05(1.21)**  | 1.70(1.01) ** |
| 34. To have hate sex                                | 2.32(1.37)**  | 1.91(1.24) ** |
| 35. Trying to get over the ex                       | 2.26(1.32)    | 2.18(1.30)    |
| 36. I was bored                                     | 2.34(1.25)**  | 2.01(1.13) ** |
| 37. I was desperate                                 | 2.29(1.28)**  | 1.95(1.18) ** |
| 38. I was curious about breakup sex                 | 2.59(1.27)    | 2.36(1.30)    |
| 39. To forget about the breakup                     | 2.24(1.26)    | 2.31(1.38)    |
| 40. Only view my ex sexually                        | 2.44(1.32)    | 2.15(1.26)    |
| 41. I wanted to take power back from the breakup    | 2.36(1.35)    | 2.41(1.31)    |
| 42. I wanted confidence                             | 2.66(1.30)    | 2.39(1.31)    |
| 43. Show the ex what they were missing              | 2.58(1.41)    | 2.58(1.40)    |
| 44. I have no idea                                  | 1.96(1.10)    | 1.82(1.14)    |
| 45. I was stressed                                  | 2.77(1.36)    | 2.49(1.33)    |
| 46. Didn't want to add to my body count (sex count) | 1.80(1.16) ** | 2.18(1.47)**  |
| Reasons that did not load when sexes were together  |               |               |
| 47. I was drunk                                     | 2.30(1.44)    | 2.05(1.19)    |
| 48. I wanted closure                                | 2.55(1.36)    | 2.59(1.36)    |
| 49. It was a final goodbye                          | 2.95(1.45)    | 2.64(1.35)    |
| 50. Have sex one last time                          | 3.10(1.37)**  | 2.57(1.40) ** |
| 51. Broke up for other reasons than feelings        | 2.36(1.34)    | 2.43(1.43)    |

---

|                                    |              |               |
|------------------------------------|--------------|---------------|
| 52. Think they are the best option | 2.74(1.30)** | 2.38(1.35) ** |
|------------------------------------|--------------|---------------|

*Note:* \*\*: < .005, Bonferroni corrections based on the number of items included were implemented. Higher numbers mean more agreement with/a higher rating for the item. Standard Deviations are in parentheses.
